# Supplementary material for: A Concise Guide to Silicone-Based Spring-Roll Actuator Assembly
Source: MDPI journal article supplement (doi:10.3390/polym15193908), 2023-09-27
Supplement: s1 [file s1]

## Supporting Information

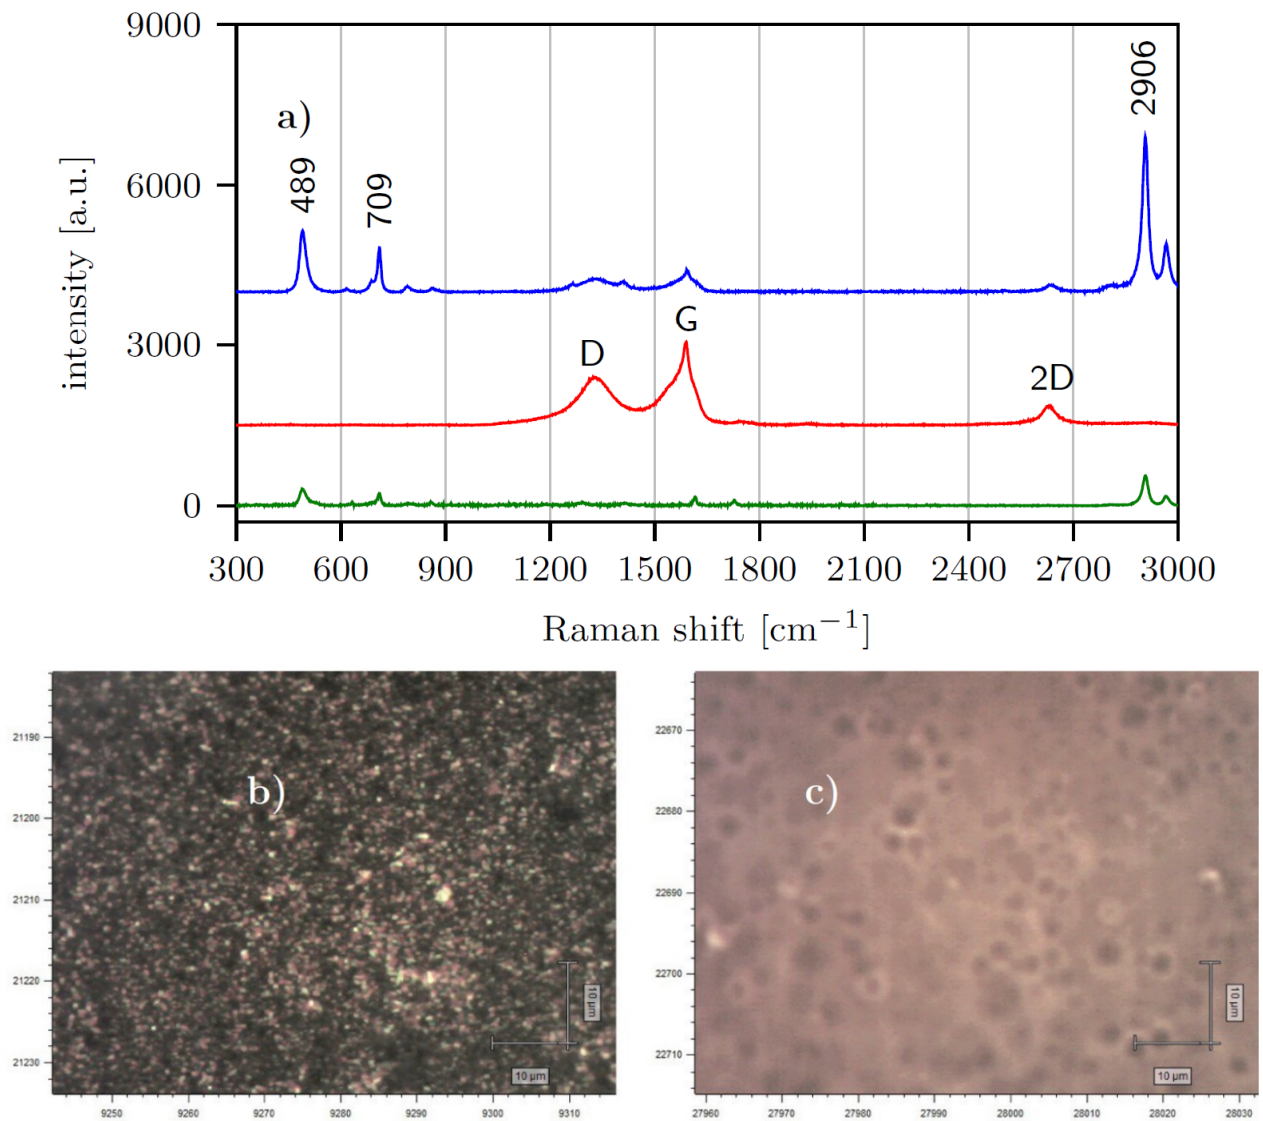

**Figure S1.** (a) Raman spectra of pristine DE film (green), DE film with the CNT/Gr-NH<sub>2</sub> deposited on it (red) and DE film with the CNT/Gr-NH<sub>2</sub> coated with the functional organosilicone polymer composite (blue). The images of the latter two are shown in (b) and (c), respectively. Description is presented in the text in detail.

**Table S1.** Comparison among various rolled DEAs reported so far [37,39–42].

|                              | Zhang et al [37]                   | Trujillo et al [39]                 | Kunze et al [42]                  | Benslimane et al [40]              | Lau et al [41]                            | This work                         |
|------------------------------|------------------------------------|-------------------------------------|-----------------------------------|------------------------------------|-------------------------------------------|-----------------------------------|
| Dielectric elastomer (DE)    | Acrylic VHB 4910                   | Dow Corning silicone<br>Sylgard 184 | Wacker silicone<br>ELASTOSIL 2030 | Wacker silicone<br>ELASTOSIL RT625 | Silicone<br>BJB TC-5005                   | Wacker silicone<br>ELASTOSIL 2030 |
| Electrode material           | Graphite powder<br>(TIMREX LB1300) | Sputtered gold                      | Carbon grease                     | Corrugated silver                  | Graphite powder<br>(TIMREX KS6)           | CNT/graphene                      |
| DE roll diameter             | 12 mm                              | 10 mm                               | 4 mm                              | —                                  | 11 mm                                     | 12 mm                             |
| DE roll length               | 45 mm                              | 25 mm                               | 60 mm                             | 100 mm                             | 61 mm                                     | 40 mm                             |
| Pre-stretch ratio            | 3 × 6.5                            | 1 × 1                               | 1.05 × 1.05                       | 1 × 1                              | 1.15 × 1.15                               | 2 × 1                             |
| Pre-tensioner                | Spring                             | Core free                           | Core free                         | Core free                          | Shell design I                            | Spring                            |
| Pre-tensioner stiffness      | 200 N m <sup>-1</sup>              | 0 N m <sup>-1</sup>                 | 0 N m <sup>-1</sup>               | 0 N m <sup>-1</sup>                | 103.0 N m <sup>-1</sup>                   | —                                 |
| Rolled DEA stiffness         | 1440 N m <sup>-1a</sup>            | —                                   | —                                 | 3052 N m <sup>-1b</sup>            | 305.0 N m <sup>-1c</sup>                  | 1500 N m <sup>-1</sup>            |
| Maximum active strain        | 31.25 % <sup>c,d</sup>             | 6.0 % <sup>c</sup>                  | 2.5 % <sup>c</sup>                | 7.0 % <sup>c</sup>                 | 6.1 % <sup>c</sup><br>11.0 % <sup>e</sup> | 6.0 % <sup>c</sup>                |
| DE breakdown field ( $E_b$ ) | 68.2 MV m <sup>-1f</sup>           | 50 MV m <sup>-1</sup>               | —                                 | 35 – 40 MV m <sup>-1</sup>         | 33.5 MV m <sup>-1</sup>                   | 80 MV m <sup>-1</sup>             |
| Pre-tensioner weight         | 7.2 g                              | —                                   | —                                 | —                                  | 1.7 g                                     | 4.5 g                             |
| Total weight                 | 8.0 g                              | —                                   | —                                 | —                                  | 7.0 g                                     | 5.0 g                             |
| Static work density          | 2.25 J kg <sup>-1</sup>            | —                                   | —                                 | —                                  | 0.133 J kg <sup>-1</sup>                  | 1.44 J kg <sup>-1</sup>           |
| % of max. work density       | 20.7 % <sup>g</sup>                | —                                   | —                                 | —                                  | 31.0 %                                    | 24.4 %                            |

<sup>a</sup> Calculated using max. blocking force/max. stroke = (7.2 N/5 mm).

<sup>b</sup> Calculated using blocking force/max. stroke = (3 N cm<sup>-2</sup> × 500 cm × 0.0082 cm)/(6.5 % × 62 mm).

<sup>c</sup> Longitudinal.

<sup>d</sup> Calculated using max. displacement of actuator/active length = (5 mm/16 mm).

<sup>e</sup> Transverse.

<sup>f</sup> Calculated using activation voltage/(initial thickness/(pre-stretch factor)) = (3500 V/(1 mm/3 × 6.5)).

<sup>g</sup> VHB properties: Young’s modulus 1.8 MPa, dielectric constant 4.7, density 960 kg m<sup>-3</sup>
